# Supplementary material for: Novel Lipid Nanoparticles Stable and Efficient for mRNA Transfection to Antigen-Presenting Cells
Source: Int J Mol Sci. 2024 Jan 23;25(3):1388. doi: 10.3390/ijms25031388 (PMC10855810; doi:10.3390/ijms25031388)
Supplement: Supplementary file 1 [file ijms-25-01388-s001.zip › ijms-2832183-supplementary.pdf]

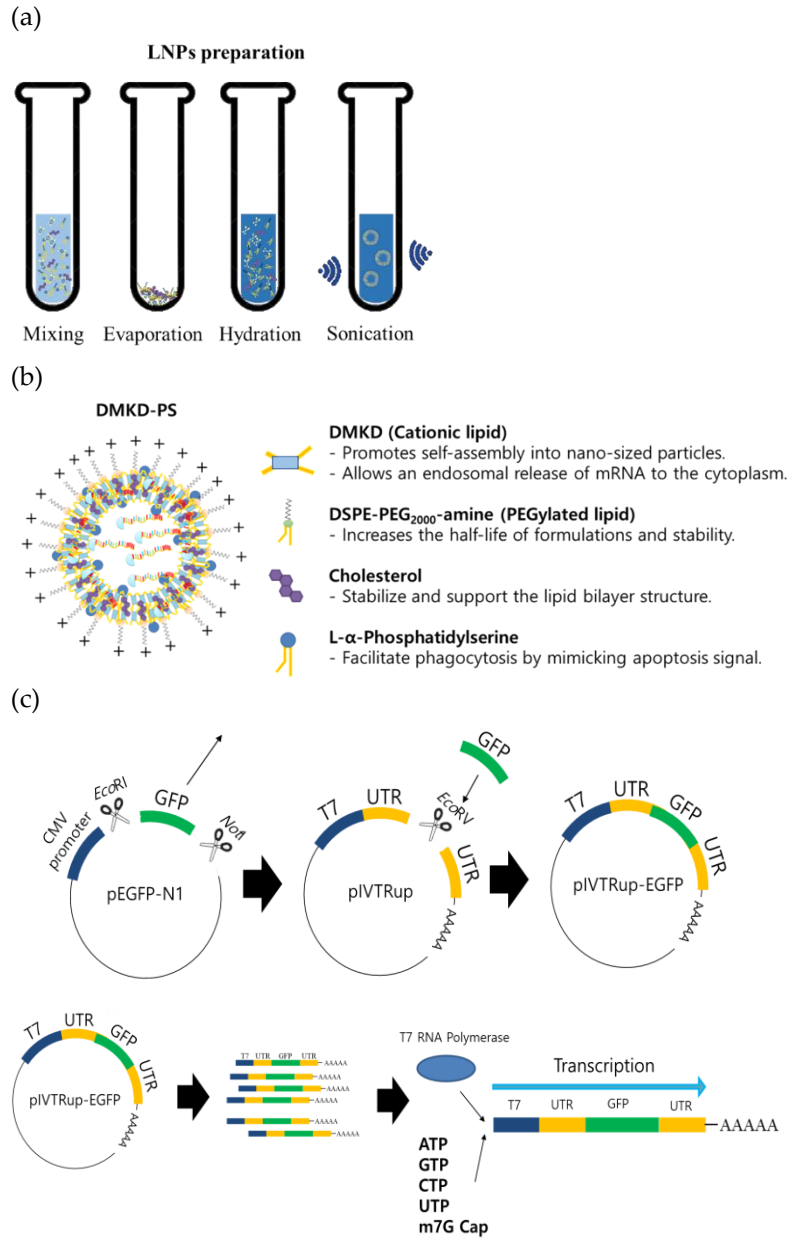

**Figure S1. Schematic illustration of DMKD-PS with mRNA.** (a) The DMKD-PS LNPs were prepared by the lipid film method and (b) each component constituting the DMKD-PS LNPs. (c) The mRNA was transcribed *in vitro* followed by mRNA complexation.

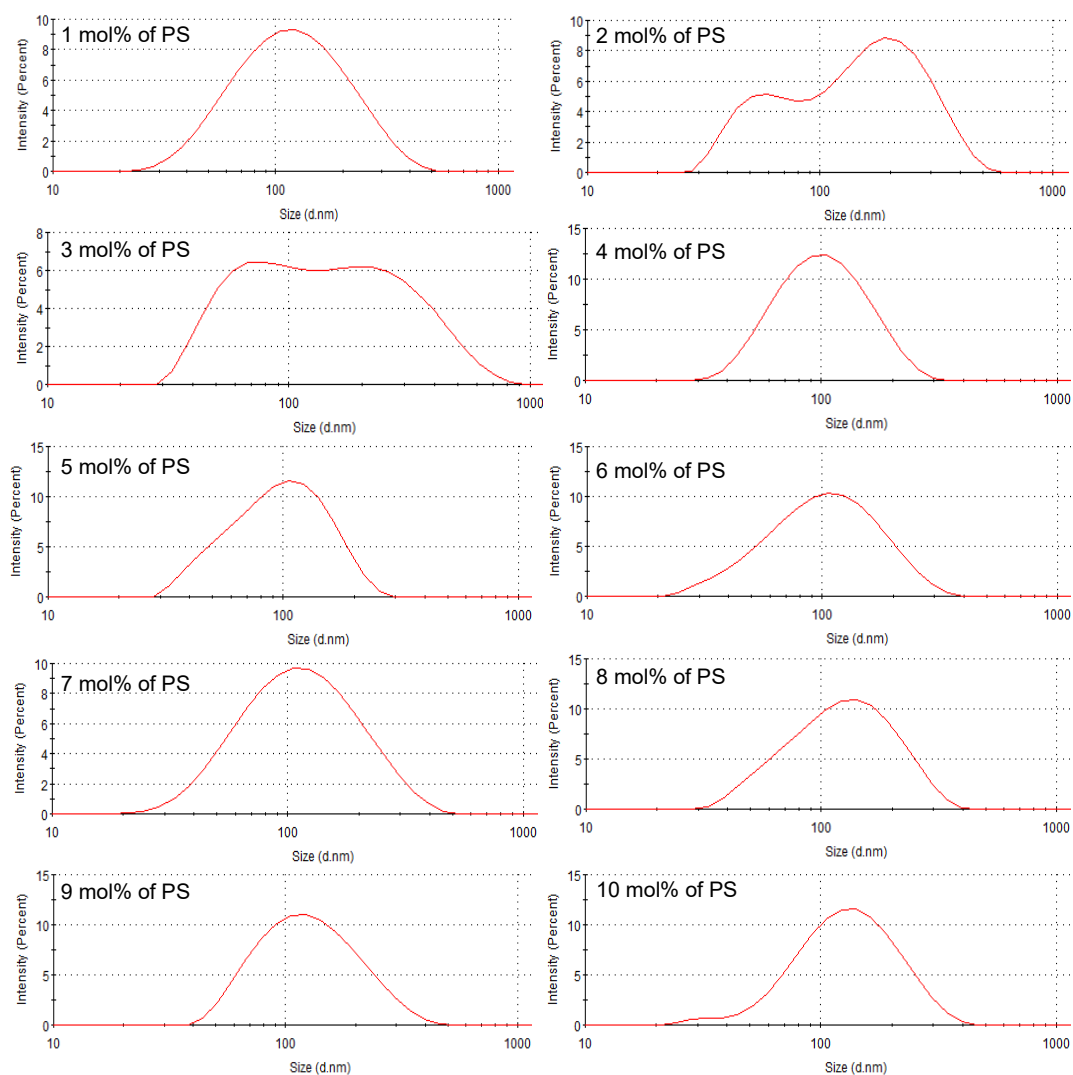

**Figure S2.** The size distribution of DMKD-PS containing the various molar ratios of PS. DMKD-PS LNPs were produced in 10 unique compositions by altering the PS molar ratio while keeping the DMKD, cholesterol, and DSPE-PEG2000 proportions consistent and then subjected to DLS analyses.

(a) N/P ratio = 1:1

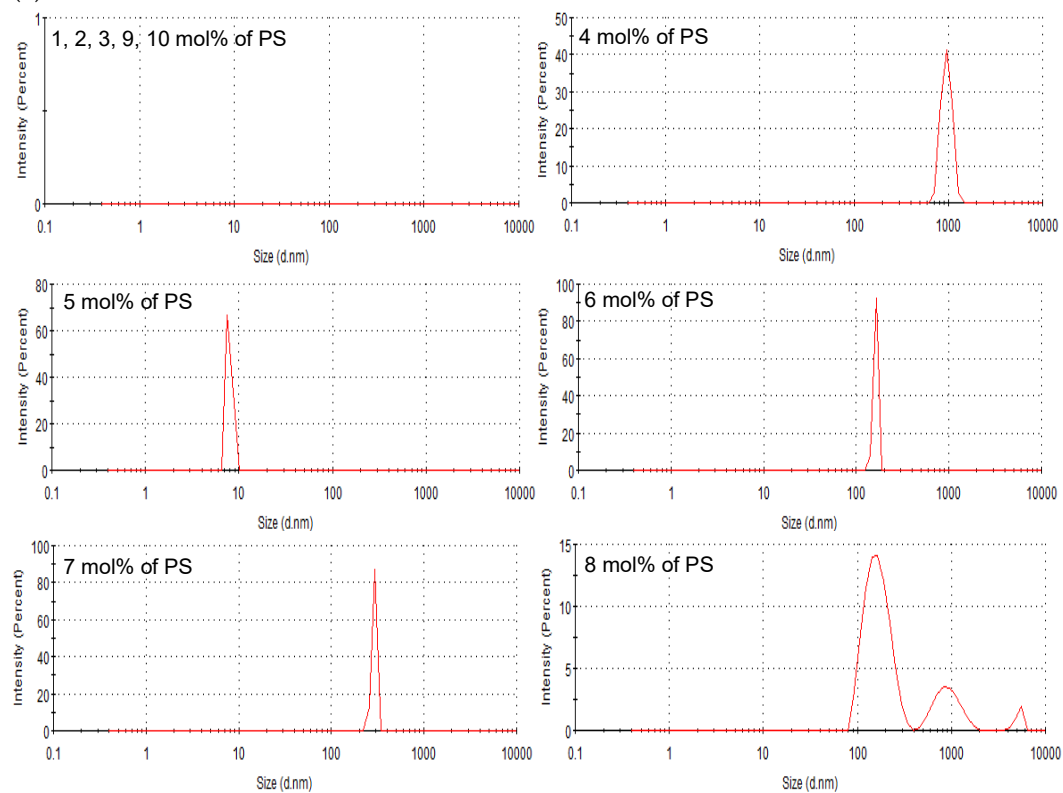

(b) N/P ratio = 2:1

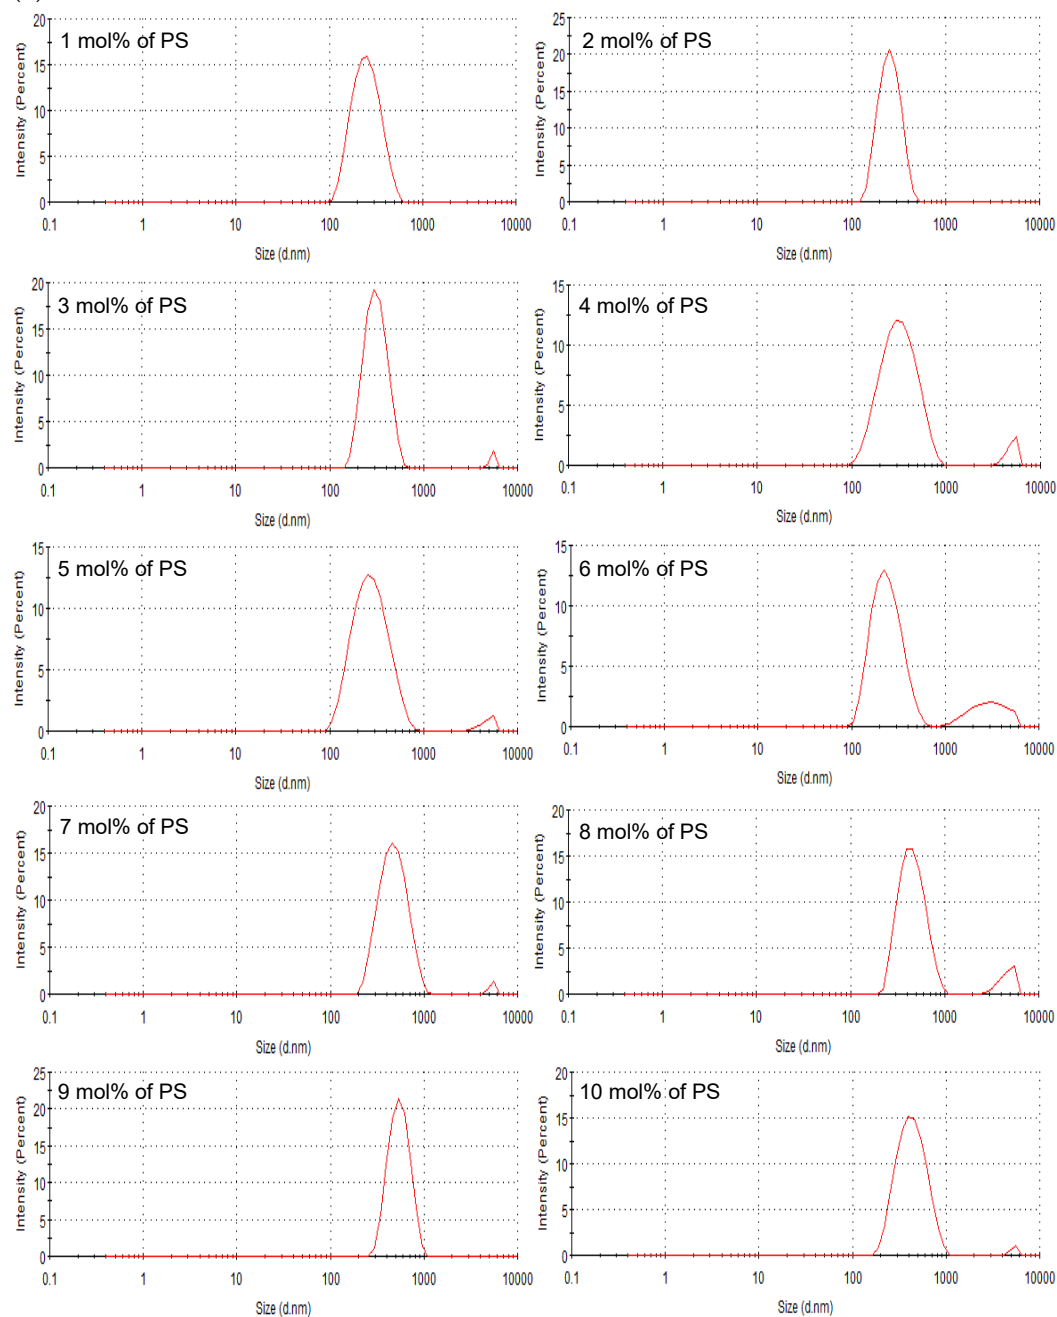

(c) N/P ratio = 3:1

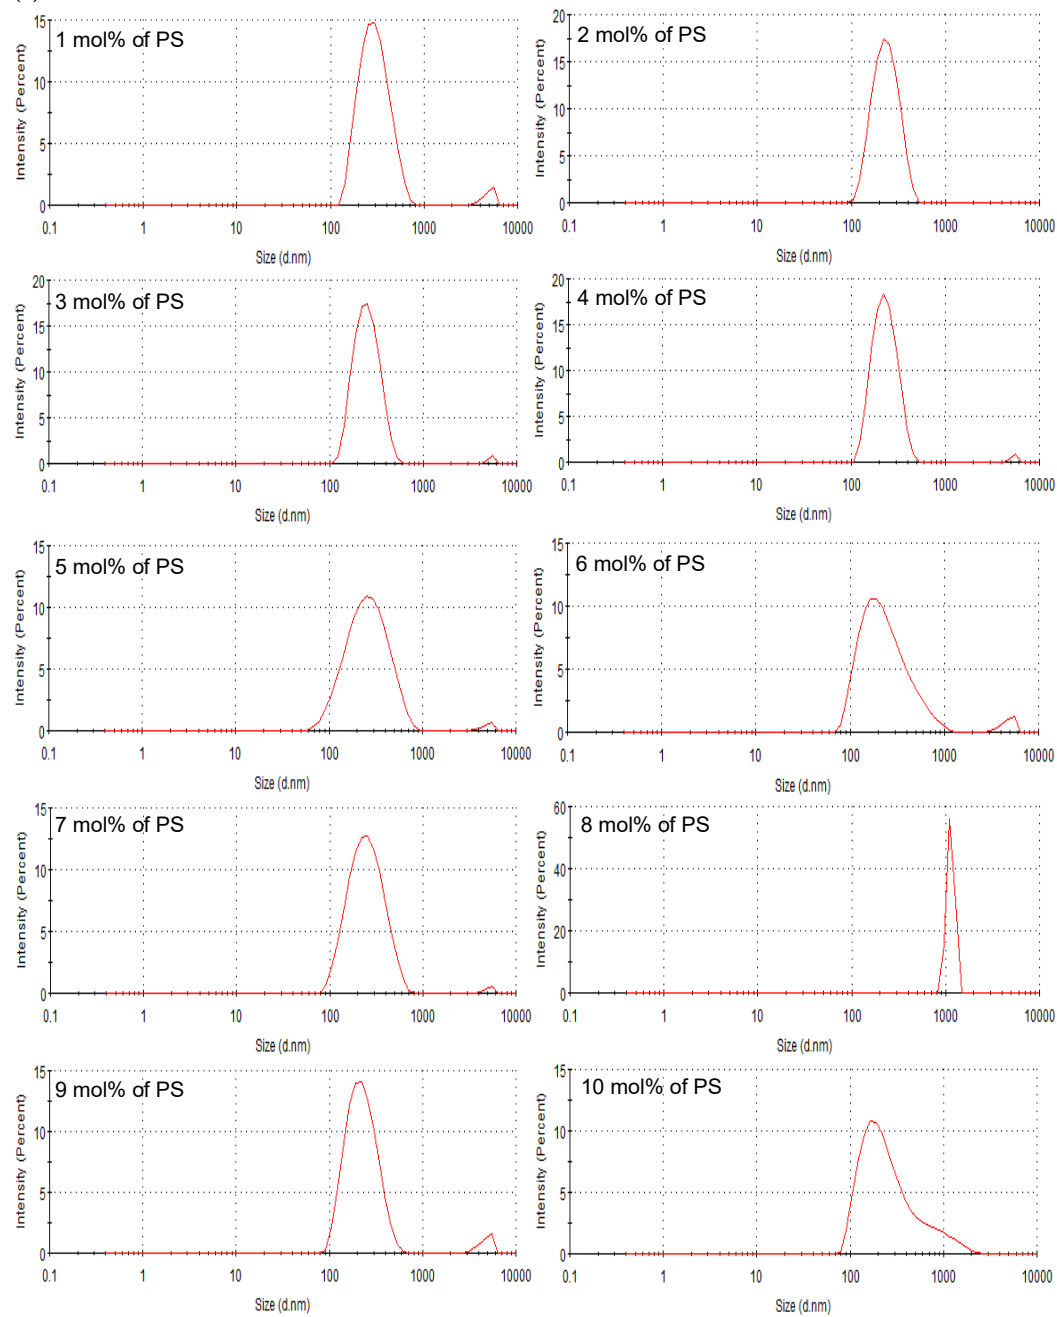

(d) N/P ratio = 4:1

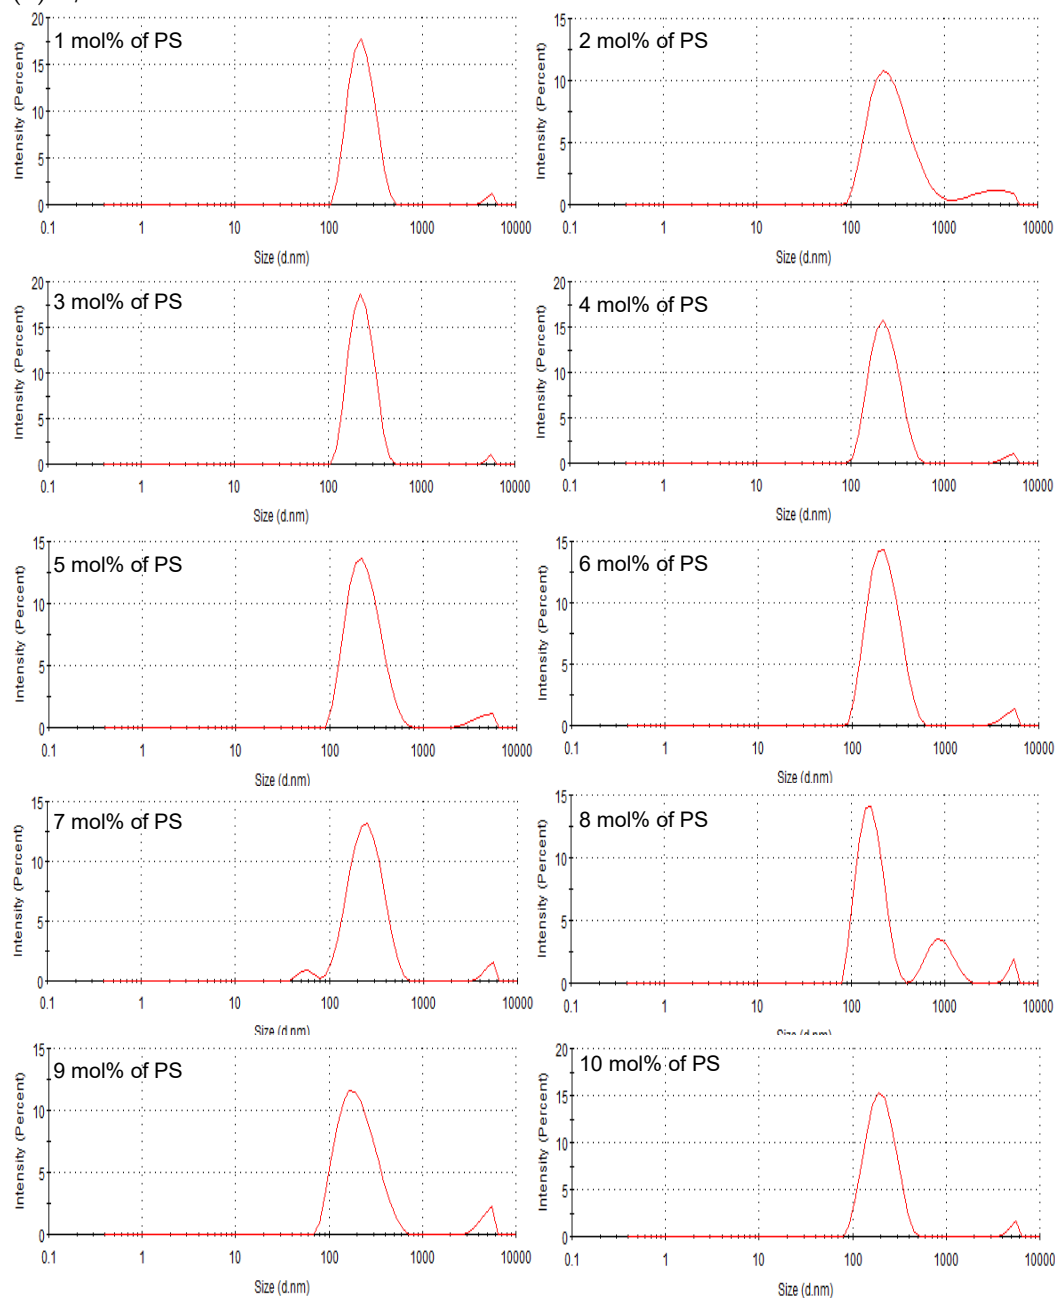

**Figure S3. The size distribution of DMKD-PS containing varied mole% of PS after mRNA complexation at various N/P ratios.** The LNPs were prepared with varied mole% of PA and then complexed with GFP mRNA at the ratios from (a) 1:1, (b) 2:1, (c) 3:1, and (d) 4:1.

Table S1. The components of various LNPs used in this study

| <b>LNPs</b>     | <b>Components</b>                        | <b>Mol%</b>             |
|-----------------|------------------------------------------|-------------------------|
| <b>ALC-0315</b> | ALC-0315, Cholesterol,<br>DSPC, ALC-0159 | 46.3 : 42.7 : 9.4 : 1.6 |
| <b>SM-102</b>   | SM-102, Cholesterol,<br>DSPC, PEG-DMG    | 50 : 38.5 : 10 : 1.5    |
| <b>DMKD</b>     | DMKD, Cholesterol,<br>DSPE-PEG           | 55 : 25 : 20            |
| <b>DMKD-PS</b>  | DMKD, Cholesterol,<br>DSPE-PEG, PS       | 55 : 25 : 18 : 2        |
